# Supplementary material for: An hTERT/ZEB1 complex directly regulates E-cadherin to promote epithelial-to-mesenchymal transition (EMT) in colorectal cancer
Source: PubMed Central journal article supplement (PMC4808003; doi:10.18632/oncotarget.5968), 2015-10-20
Supplement: oncotarget-07-0351-s001.pdf [file oncotarget-07-0351-s001.pdf]

SUPPLEMENTARY FIGURES

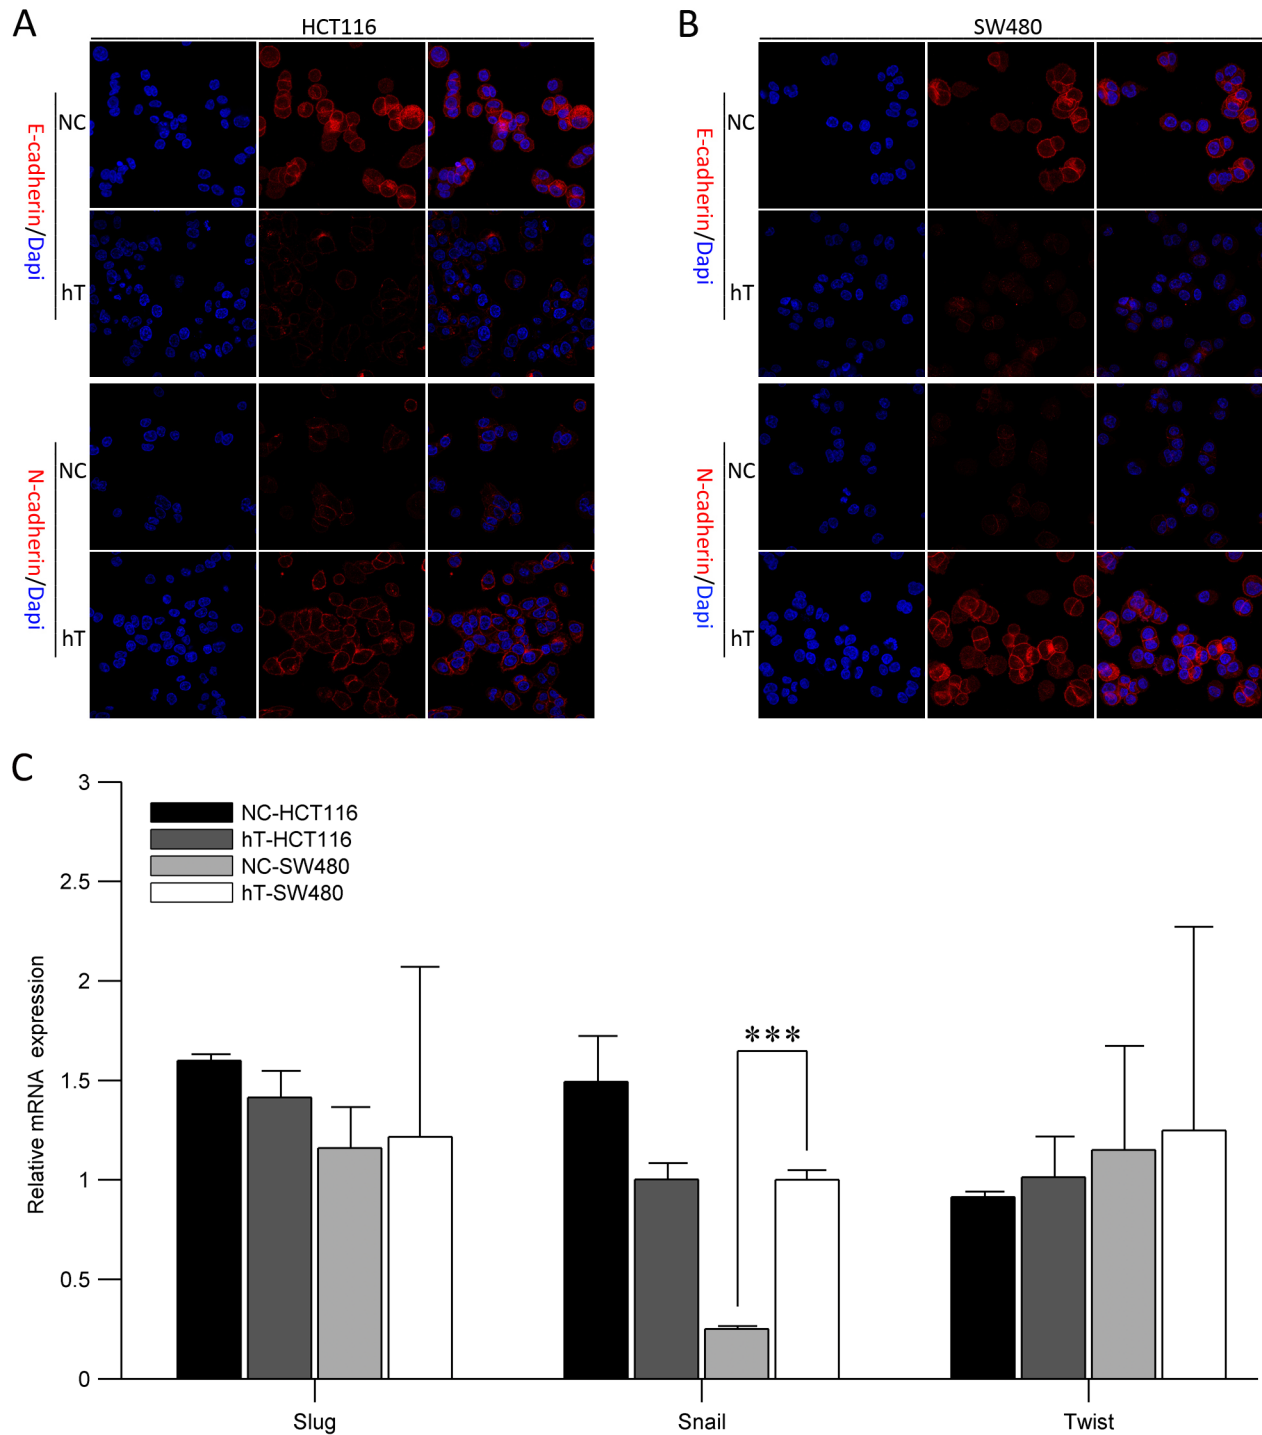

**Supplementary Figure S1:** A–B. Immunofluorescence of E-cadherin and N-cadherin in SW480 and HCT116 cells after hTERT overexpression. C. qRT-PCR of Slug, Snail and Twist in SW480 and HCT116 cells after hTERT overexpression.

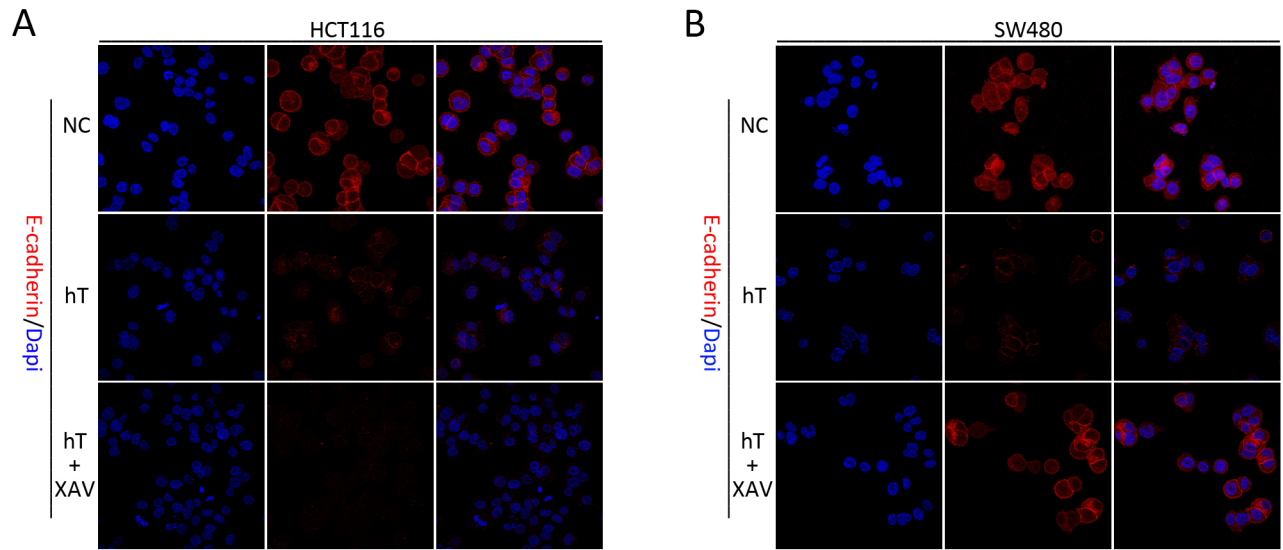

**Supplementary Figure S2: A–B.** Immunofluorescence of E-cadherin in SW480 and HCT116 cells after hTERT overexpression and Wnt inhibition (XAV).

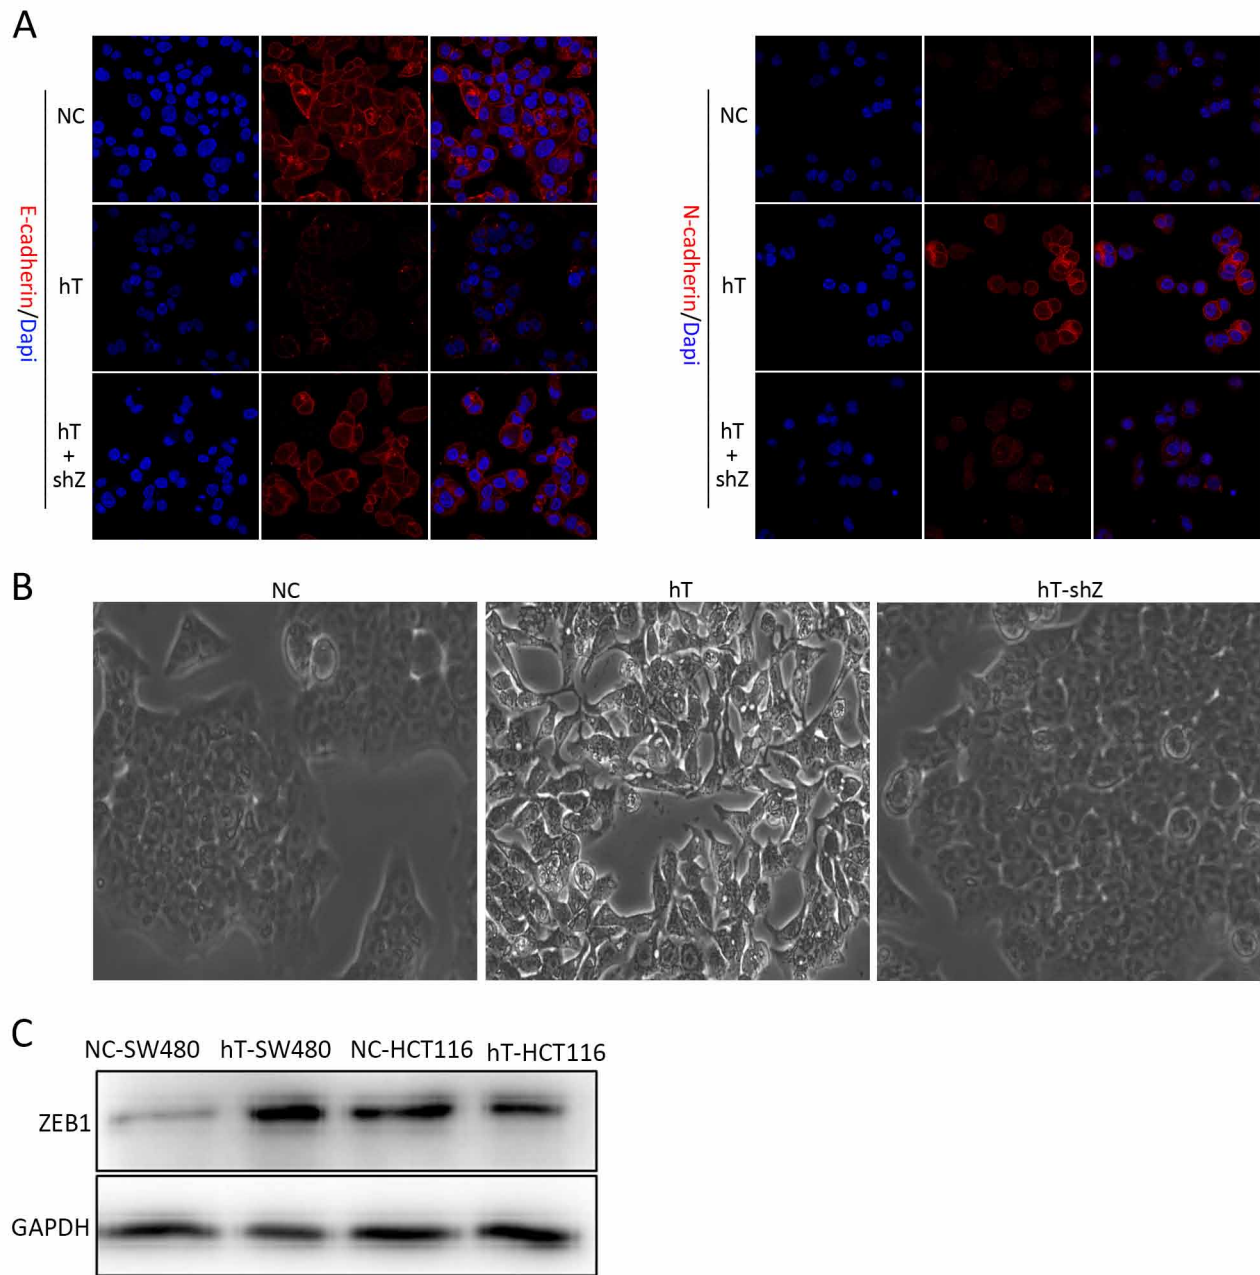

**Supplementary Figure S3:** **A.** Immunofluorescence of E-cadherin in HCT116 cells after hTERT overexpression and ZEB1 knock down. **B.** Cell morphological changes after hTERT overexpression and ZEB1 knock down in HCT116 cells. **C.** ZEB1 expression was analyzed by western blot after hTERT overexpression in SW480 and HCT116 cells.
